# Supplementary material
Source: Springer Nature journal article supplement (https://www.springermedizin.de/resource/supplementary/12871_2014_301_MOESM3_ESM.pdf/9429304)

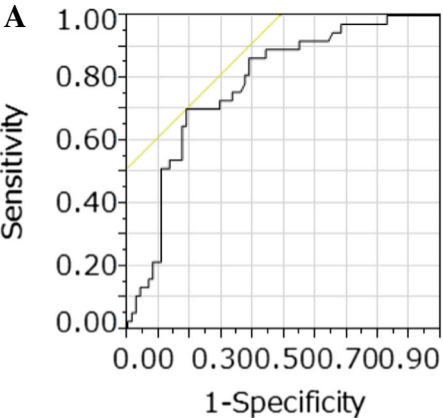

non-AKI

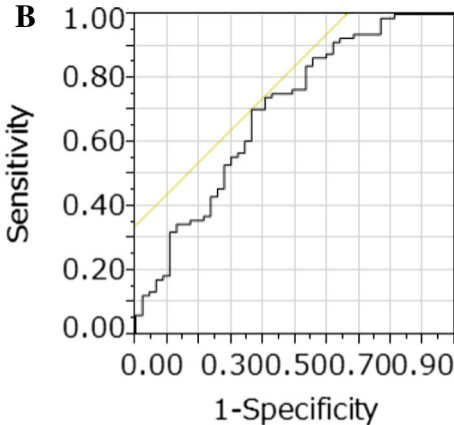

AKI  
(Risk, Injury, Failure)

Supplement: MOESM3 [file 9429304]
